# Supplementary material
Source: publisher site journal article supplement (https://www.dovepress.com/article/517416)
Supplement: Supplementary file 1 [file 517416-supplementary-materials.docx]

**Bacteriological Identification and Characterization of Feces Microbiome in Prostate Cancer Patients
Undergoing Radiotherapy**

**Supplementary Materials**

**Supplementary Table 1.** The results of the bacterial species correlation with the isolation time after examination of the residuals from the chi-square test.

| **Isolation time** | **Most overrepresented species** | **Positive Residual Value** | **Most underrepresented species** | **Negative Residual Value** |
| --- | --- | --- | --- | --- |
| K1 | *Enterococcus hirae* | 1.523 | *Citrobacter braakii* | -1.0 |
| K2 | *Citrobacter braakii* | 1.827 | *Bifidobacterium longum* | -1.0 |
| K3 | *Enterobacter asburiae* | 3.0 | *Citrobacter braakii* | -1.0 |


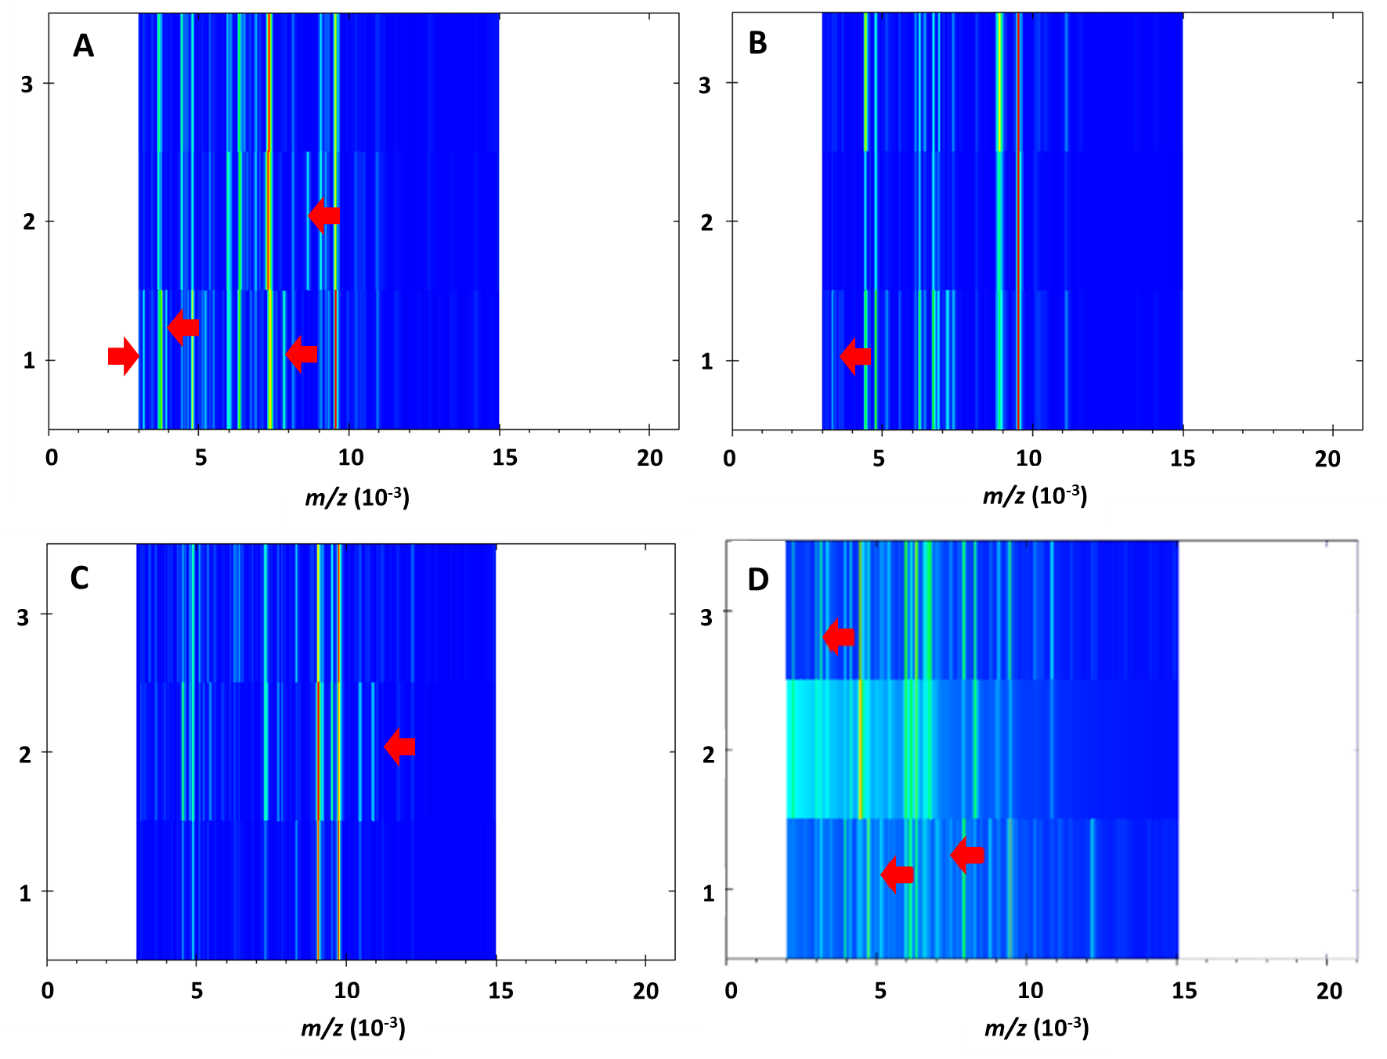


**Supplementary Figure 1.** GelView of four strains of (A) *Enterococcus faecium*, (B) *Enterococcus faecalis*, (C) *Escherichia coli*, (D) *Streptococcus salivarius* isolated from the same microbiological medium at time K1, K2, and K3. The red arrows indicate differentiating signals between the strains.
